# Supplementary material
Source: PubMed Central journal article supplement (PMC4103337)
Supplement: 1321568111_pnas.201321568SI.pdf [file 1321568111_pnas.201321568SI.pdf]

# Supporting Information

Liang et al. 10.1073/pnas.1321568111

## SI Materials and Methods

**Plant Materials and Growth Conditions.** The prematurely senile 1 (*ps1-D*) mutant was identified by screening our transferred-DNA (T-DNA) population in the *japonica* Nipponbare background (1). For expression analysis, various organs were collected starting from the heading stage. To determine the fine expression pattern of *Oryza sativa* NAC (no apical meristem, *Arabidopsis* ATAF1/2, and cup-shaped cotyledon2)-like, activated by *apetala3/pistillata* (*OsNAP*), flag leaves were harvested every 7 d after leaf emergence, and seeds were collected every 2 d after flowering. For *PSI* induction analysis, wild-type plants were hydroponically cultured with normal half-strength modified Hoagland medium after germination in the greenhouse for 10 d at 30 °C and with a 14-h light/24 °C, 10-h dark cycle. Whole 10-d-old Nipponbare plants were immersed in nutrition solutions containing different kinds of phytohormones, including brassinosteroid (50 μM), gibberellin (50 μM), auxin (50 μM), 6-benzylaminopurine (50 μM), salicylic acid (100 μM), 1-aminocyclopropane-1-carboxylic acid (50 μM), jasmonic acid (50 μM), and abscisic acid (ABA) (50 μM), and were maintained for 2 h in the dark under cold (4 °C) and alkaline (pH = 11) conditions with 200 mM mannitol and 200 mM NaCl. Twenty plants were collected for RNA isolation. All experiments were repeated three times independently.

**Cloning *PS1*.** Genetic linkage analysis was performed with the T-DNA insertion using the T<sub>1</sub> progenies of the *ps1-D* mutant. The flanking sequence of the T-DNA in *ps1-D* was isolated by SiteFinding PCR (2). (The primers used for SiteFinding PCR are listed in Table S5.)

**Constructions for Rice Transformation.** For the *OsNAP* over-expression construct, a 1,179-bp section of full-length cDNA was amplified by PCR from the cDNA library of Nipponbare and was subcloned into the XmaI and XbaI sites of the binary vector pCAMBIA2300-*Actin1* to generate the pAOS construct. To make the *OsNAP* RNAi construct, a 274-bp gene-specific fragment from bp 457–730 of the *OsNAP* ORF was amplified, and cloned into the SalI and PstI sites of the binary vector pCAMBIA2300-35S as described previously (5). For promoter analysis, the fragment ~1.9 kb upstream of the *OsNAP* 5' region was amplified and ligated into the pCAMBIA2391Z vector between SalI and EcoRI. The wild-type rice variety Nipponbare, was used as the recipient for all transformations by the *Agrobacterium tumefaciens*-mediated method (3). The primer sequences are listed in Table S6.

**Constructions for Yeast One-Hybrid Assay.** To generate activation domain OsNAP (AD-OsNAP), the full-length *OsNAP* was amplified using thermostable DNA polymerase from *Thermococcus kodakaraensis* (KOD) polymerase (Toyobo) and was subcloned into the EcoRI and XhoI sites of the binary vector pJG4-5 vector (Clontech). To generate *SGRpp::LacZ*, *NYC1pp::LacZ*, *NYC3pp::LacZ*, *RCCR1pp::LacZ*, *Osh36pp::LacZ*, *Osh69pp::LacZ*, and *Os157pp::LacZ* reporter constructs, the promoter fragments were amplified by PCR and then cloned into the pLacZi2μ vector. The primer sequences are listed in Table S6.

**Expression Analysis.** Total RNA was extracted using a TRIzol kit (Invitrogen) according to the manufacturer's instructions. RNA was reverse-transcribed using the ReverTra Ace quantitative PCR RT Master Mix Kit with gDNA remover (Toyobo). Quanti-

tative real-time PCR was performed with a Chromo4 real-time PCR detection system (Bio-Rad) according to the manufacturer's instructions. Rice *OsActin1* was used as an internal control. The primers used for quantitative RT-PCR (qRT-PCR) are listed in Table S6. Values are means ± SD of three biological repeats. The Student *t* test was used for statistical analysis.

**β-Glucuronidase Staining.** β-Glucuronidase (GUS) staining was performed as described previously (4). Images were taken directly or with a stereomicroscope (SZX16; Olympus).

**Chlorophyll Measurements.** Chlorophyll was extracted from 50 mg of leaf tissue (fresh weight), and its content was determined by measuring the absorbance at 652 nm using a Tecan Infinite M200 multimode reader (Tecan Group Ltd) as described previously (5).

**Transactivation Activity Assay in Yeast.** The coding sequences of *OsNAP* and *OsNAP* fragments were obtained by PCR. Primers used are included in Table S6. The PCR products were digested by NdeI/EcoR, and then cloned into the vector pGBKT7. Three constructs with deletions in middle of the gene were made also, and the N-terminal parts (amino acids 1–64, 1–100, and 111–142) of these constructs were fused to the C-terminal fragment (amino acids 181–392). The Matchmaker Gold Yeast Two-Hybrid system (Clontech) was used for the transactivation activity assay according to the manufacturer's protocol. Each yeast liquid culture was diluted serially to OD<sub>600</sub> = 0.6, and 3 μL of each dilution was inoculated onto tryptophan-, histidine-, and adenine-negative synthetic dropout medium.

**Dark-Induced Leaf Senescence.** Fully expanded flag leaves were excised carefully. Detached leaves were cut into ~3-cm pieces and floated on 25 mL of water or 50 μM of ABA solution in Petri dishes with the adaxial side up. The samples were incubated at 28 °C in darkness for 5–10 d (5).

**Yeast One-Hybrid Assay.** Plasmids for the GAL DNA-binding domain fused with *OsNAP* were cotransformed with the *LacZ* reporter genes driven by *SGR*, *NYC1*, *NYC3*, *RCCR1*, *Osh36*, *Os157*, and *Osh69* promoter fragments (Clontech) into the yeast strain EGY48 using a standard transformation technique. Transformants were grown on proper drop-out plates containing X-Gal for blue color development (6). Representative data are shown from one of the three biological replicates, which yielded similar results.

**ABA Analysis.** Extraction and determination of ABA from age-matched flag leaves at the heading stage was performed as described (7). Four independent biological repeats were performed.

**Microarray Hybridization and Data Analysis.** For the microarray experiment, RNAs from fully expanded flag leaves of wild-type and *ps1-D* plants were used for microarray hybridization (CapitalBio Corporation). Probe labeling and chip hybridization were carried out through the Affymetrix custom service following the standard protocol ([www.affymetrix.com/](http://www.affymetrix.com/)). Normalization was performed according to the standard Affymetrix protocol to allow the comparison of the samples for each set of experiments. The differently expressed genes (DEGs) in wild-type and *ps1-D* plants were classified functionally using the biological process category of Rice Gene Ontology ([www.geneontology.com](http://www.geneontology.com/)). The percentage shown in Table S1 refers to the ratio of genes relative

to the total up-regulated or down-regulated DEGs in each functional category. Three independent biological replicates were conducted for the wild-type and *ps1-D* plants, and DEGs with  $\log_2$  ratios  $\geq 1.00$  or  $\leq -1.00$  (only GO Slim IDs with  $P$  values  $\leq 0.5$ ) were analyzed.

**Element and Protein Measurements.** Element and protein measurements were performed as described (8, 9).

**ChIP-PCR Assay.** The wild-type rice (Nipponbare) and its transgenic calli harboring the *Pro35S:OsNAP-MYC* construct were used for ChIP assays according to the method described previously (10). Antibody to the MYC tag was used to immunoprecipitate OsNAP-MYC and associated DNA fragments. Immunoprecipitation was performed with anti-MYC antibody (A-MYC) or without antibody (No Ab). Fragments (2,000 bp) of sequences upstream of ATG were chosen as the promoter regions for designing primers. The promoter of *Ubiquitin* was used as a negative control. Three independent biological repeats were performed.

**Phylogenetic Analysis.** Protein sequences showing similarity to OsNAP were retrieved using the public BLAST on the National Center for Biotechnology Information Website ([www.ncbi.nlm.nih.gov/](http://www.ncbi.nlm.nih.gov/)). Multiple alignments of the homologs were performed by Clustal X version 2.0 with the default parameters and manually adjusted (11).

**Field Cultivation of Rice.** The rice plants were grown in a standard paddy field at the Experimental Station of the Institute of Genetics and Developmental Biology. The field planting followed a randomized complete-block design with three replicates; the plants were transplanted at a spacing of  $20 \times 20$  cm. The area per plot was  $4 \text{ m}^2$ . These plants then were grown under conventional cultivation conditions. Agronomic traits were measured using at least 10 plants randomly obtained from the center of the plot to avoid any irregularities present at the plot margins.

**Accession Codes.** Genes and their associated accession codes from GenBank/EMBL are as follows: *Osh36* (AF251070), *OsI57* (AF251076), *Osh69* (AF251068), *OsI85* (AF251075), *OsNCED1* (AY838897), *OsNCED2* (AY838898), *OsNCED3* (AY838899), *OsNCED4* (AY838900), and *OsNCED5* (AY838901). Genes and their associated accession codes from Rice Annotation Project Database are as follows: *OsNAP* (*LOC\_Os03g21060*), *G1* (*LOC\_Os03g21020*), *G2* (*LOC\_Os03g21030*), *G3* (*LOC\_Os03g21040*), *G4* (*LOC\_Os03g21050*), *G5* (*LOC\_Os03g21070*), *G6* (*LOC\_Os03g21080*), *G7* (*LOC\_Os03g21090*), *G8* (*LOC\_Os03g21100*), *G10* (*LOC\_Os03g21110*), *SGR* (*LOC\_Os09g36200*), *NYC1* (*LOC\_Os01g12710*), *NYC3* (*LOC\_Os06g24730*), *RCCR1* (*LOC\_Os10g25030*), *OsZEP* (*LOC\_Os04g37619*), *OsABA8OX1* (*LOC\_Os02g47470*), *OsABA8OX2* (*LOC\_Os08g36860*), and *OsABA8OX3* (*LOC\_Os09g28390*).

- Ma Y, et al. (2009) Molecular analysis of rice plants harboring a multi-functional T-DNA tagging system. *J Genet Genomics* 36(5):267–276.
- Wang H, et al. (2011) Computation-assisted SiteFinding-PCR for isolating flanking sequence tags in rice. *Biotechniques* 51(6):421–423.
- Liu X, Bai X, Wang X, Chu C (2007) OsWRKY71, a rice transcription factor, is involved in rice defense response. *J Plant Physiol* 164(8):969–979.
- Jefferson RA (1989) The GUS reporter gene system. *Nature* 342(6251):837–838.
- Kong Z, Li M, Yang W, Xu W, Xue Y (2006) A novel nuclear-localized CCH-type zinc finger protein, OsDOS, is involved in delaying leaf senescence in rice. *Plant Physiol* 141(4):1376–1388.
- Lin R, et al. (2007) Transposase-derived transcription factors regulate light signaling in *Arabidopsis*. *Science* 318(5854):1302–1305.
- Fu J, Chu J, Sun X, Wang J, Yan C (2012) Simple, rapid, and simultaneous assay of multiple carboxyl containing phytohormones in wounded tomatoes by UPLC-MS/MS using single SPE purification and isotope dilution. *Anal Sci* 28(11):1081–1087.
- Sperotto RA, et al. (2009) Identification of up-regulated genes in flag leaves during rice grain filling and characterization of OsNAC5, a new ABA-dependent transcription factor. *Planta* 230(5):985–1002.
- Uauy C, Distelfeld A, Fahima T, Blechl A, Dubcovsky J (2006) A NAC Gene regulating senescence improves grain protein, zinc, and iron content in wheat. *Science* 314(5803):1298–1301.
- Lu Z, et al. (2013) Genome-wide binding analysis of the transcription activator ideal plant architecture1 reveals a complex network regulating rice plant architecture. *Plant Cell* 25(10):3743–3759.
- Larkin MA, et al. (2007) Clustal W and Clustal X version 2.0. *Bioinformatics* 23(21):2947–2948.

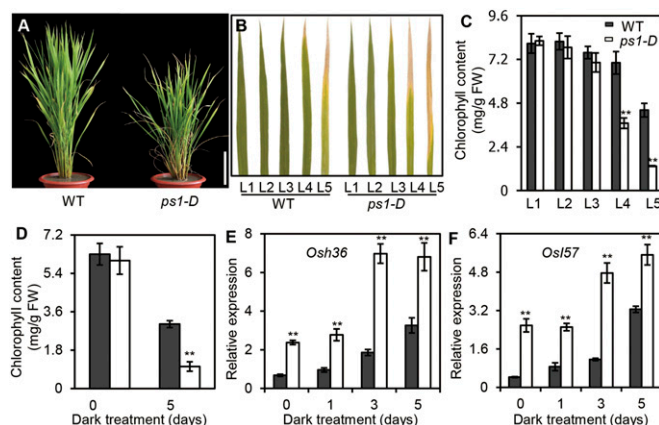

**Fig. S1.** Characterization of *ps1-D* mutants at the vegetative growth stage. (A) Phenotypes of the *ps1-D* mutant in the vegetative growth stage. (Scale bar: 20 cm.) (B) The upper five leaves from the main culm of *ps1-D* mutants and wild-type plants 60 d after transplanting. (C) Chlorophyll content of the leaves shown in B. Values are means  $\pm$  SD of 10 measurements. (D) Chlorophyll content of the leaves shown in Fig. 1D. Values are means  $\pm$  SD of 10 measurements. (E and F) Expression of the senescence markers *Osh36* (E) and *OsI57* (F) in the detached leaves of *ps1-D* mutants and wild-type plants incubated with water for 5 d in darkness.  $**P \leq 0.01$ ; Student *t* test.

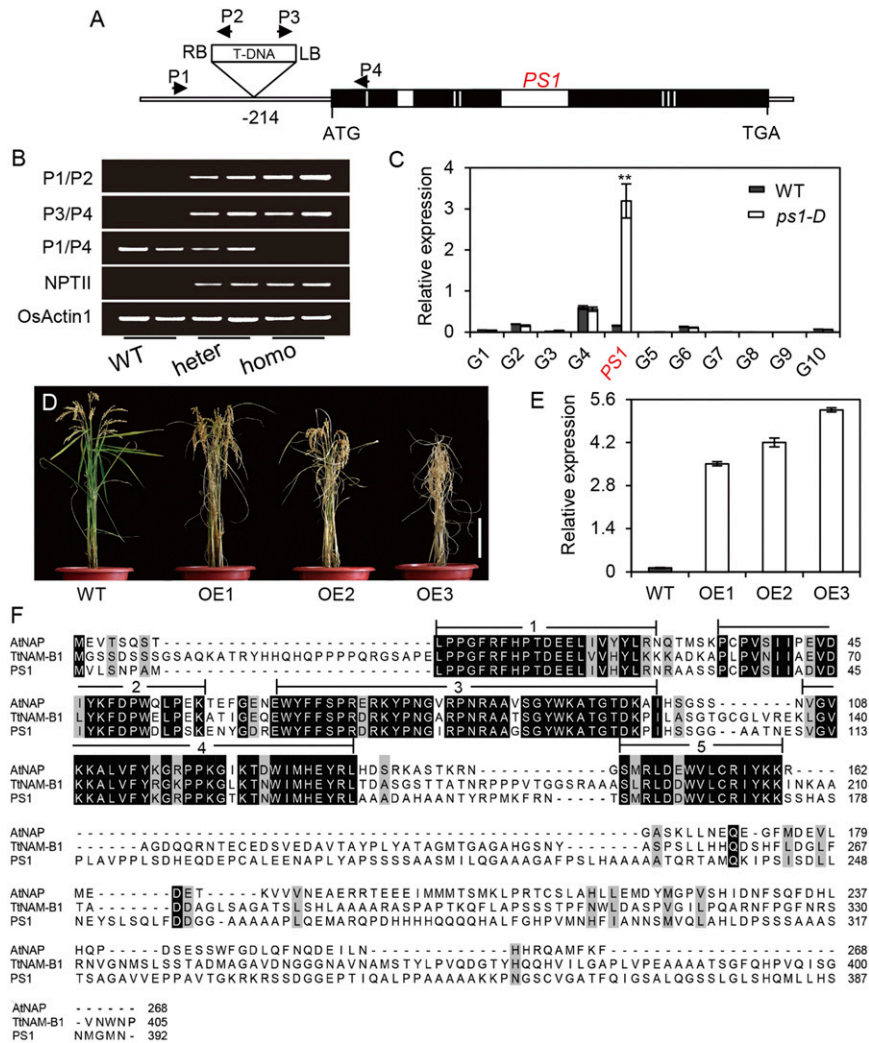

**Fig. S2.** Cloning of *PS1*. (A) Schematic representation of the T-DNA flanking region of the *ps1-D* mutant. LB and RB represent the left and right borders of the T-DNA, respectively. (B) Flanking sequence was confirmed by PCR using the primers indicated in A. Heter, heterozygous *ps1-D* mutant; Homo, homozygous *ps1-D* mutant. (C) The expression of *PS1* was specifically activated in *ps1-D* mutants. G1–G4 are four genes located in the 50-kb region upstream of the T-DNA insertion site; G5–G10 are six genes located in the 50-kb region downstream of the *PS1* gene. **\*\*** $P \leq 0.01$ ; Student *t* test. (D) Overexpression of *PS1* mimics the premature senescence phenotype of *ps1-D* mutants. (Scale bar: 20 cm.) (E) qRT-PCR analysis of *PS1* transcript levels in wild-type plants and three lines overexpressing *PS1* (OE1–OE3). (F) Protein sequence alignment of *PS1* and homologs in *Arabidopsis* and wheat using Clustal W. Conserved amino acids are highlighted: White letters on a black background indicate amino acids that are conserved across all three samples (100% conservation); black letters on a gray background indicate amino acids that are conserved in two of our three samples (66% conservation).

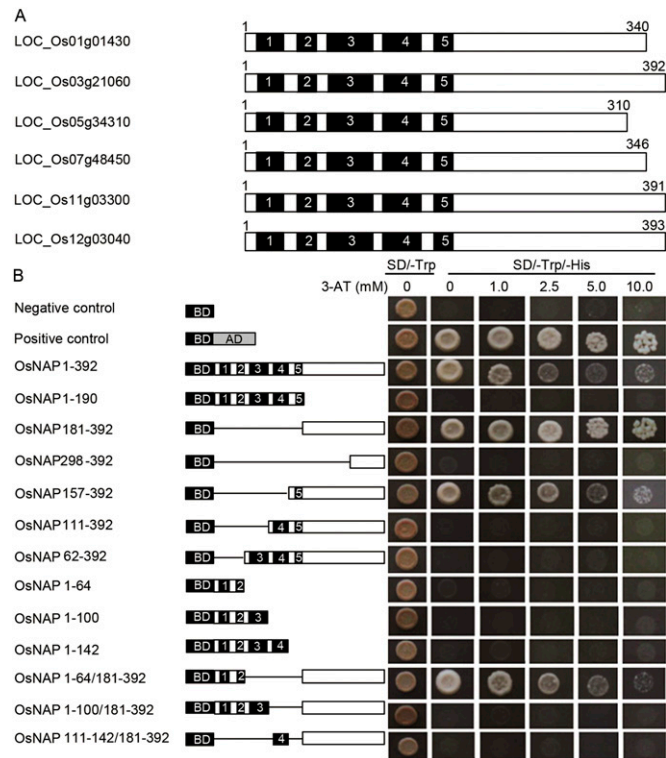

**Fig. S3.** Transcriptional analysis of OsNAP. (A) Schematic structure of Va (1)/ NAP members in rice. Numbers indicate the position of amino acids. (B) (Left) Schematic structure of OsNAP protein. Numbers indicate the position of amino acids. (Right) Truncation analysis of transcriptional activation activity of OsNAP. Various truncated *OsNAPs* were constructed as bait vectors. BD, GAL4 DNA-binding domain. Empty control vector (BD) and *GAL4* genes were used as negative and positive controls, respectively. All bait vectors were transformed into yeast strain Y2HGGold (Invitrogen). Yeast was grown at 30 °C for 3 d on the synthetic dextrose agar plates lacking leucine and histidine and containing different concentrations of 3-amino-1,2,4-triazole, as indicated.



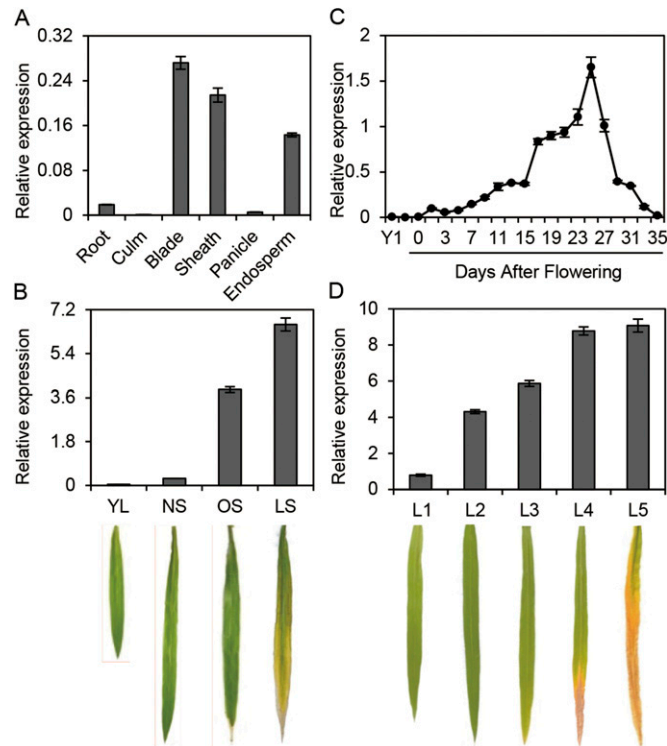

**Fig. S4.** Analysis of *OsNAP* expression. (A) Expression of *OsNAP* in various organs, including root, culm, leaf blade, leaf sheath, and panicle at the heading stage and endosperm 7 d after flowering. (B) Expression of *OsNAP* in leaves at different developmental stages. LS, leaf at the late stage of senescence, with >50% leaf area yellowing; NS, fully expanded, nonsenescent leaf; OS, leaf at the onset of senescence, with <5% leaf area yellowing; YL, young leaf approximately half the size of a fully expanded leaf. (C) Change over time in the *OsNAP* transcription levels of the seeds. Y1, young panicle (1–2 cm). (D) *OsNAP* expression in different leaves at the heading stage. L1–L5, leaf of plants numbered from top to bottom.

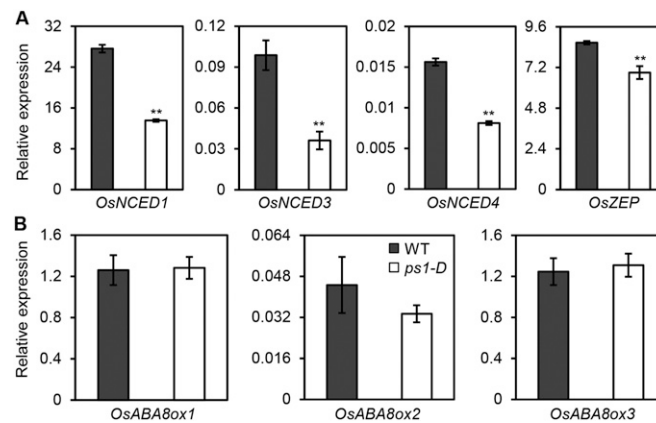

**Fig. S5.** Expression of ABA-related genes. \*\* $P \leq 0.01$ ; Student *t* test. (A) Expression of ABA biosynthetic genes in wild-type and *ps1-D* mutant plants. (B) Expression of ABA metabolism genes in wild-type and *ps1-D* mutant plants.

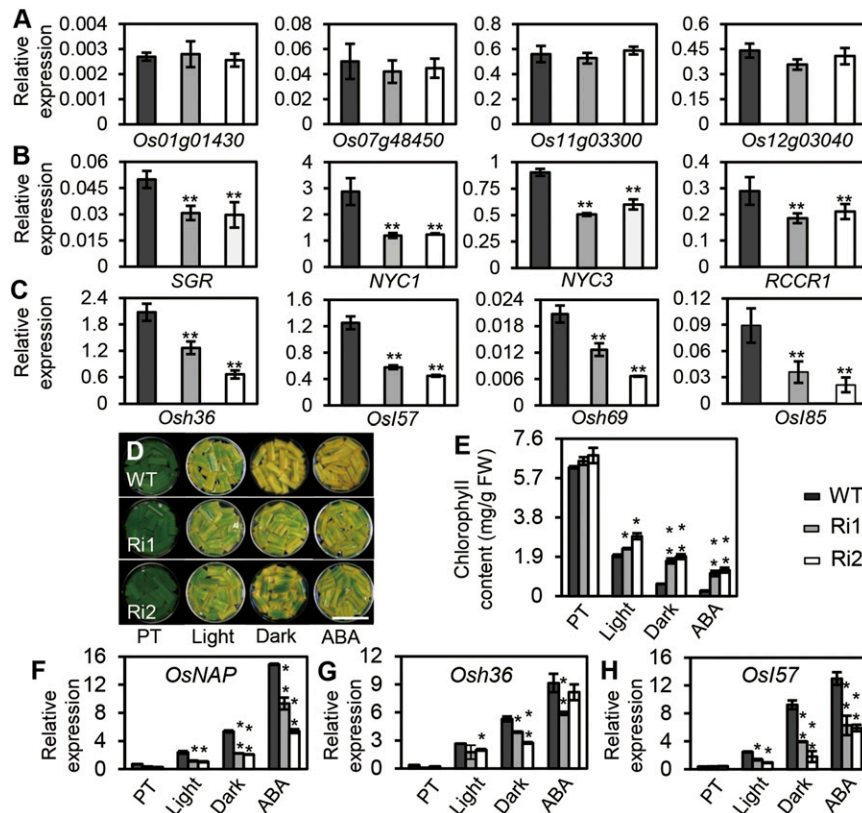

**Fig. 56.** Confirmation of *OsNAP* function by RNAi (Ri) transgenic lines. (A) Expression analysis of five orthologous members of *OsNAP* among wild-type, Ri1, and Ri2 transgenic lines. *LOC\_Os05g34310* was not detected in leaves. (B and C) Expression analysis of four chlorophyll degradation-related genes (CDGs) (*SGR*, *NYC1*, *NYC3*, and *RCCR1*) (B) and four other senescence-associated genes (SAGs) (*Osh36*, *Osi57*, *Osh69*, and *Osi85*) (C) in wild-type and *OsNAP* RNAi transgenic lines. (D) Delay in the dark- and ABA-induced senescence phenotype of the *OsNAP* RNAi leaves. Detached flag leaves from the wild-type and *OsNAP* RNAi lines at the heading stage were incubated with continuous light (H<sub>2</sub>O), darkness (H<sub>2</sub>O), and ABA (continuous light). PT, Pretreatment. (Scale bar: 2 cm.) (E) Chlorophyll content of the detached leaves; labels are as in D. Values are means  $\pm$  SD of five measurements. (F–H) Expression of *OsNAP* (F), *Osh36* (G), and *Osi57* (H) in detached leaves; labels are as in D. \* $P \leq 0.05$ ; \*\* $P \leq 0.01$ ; Student *t* test.

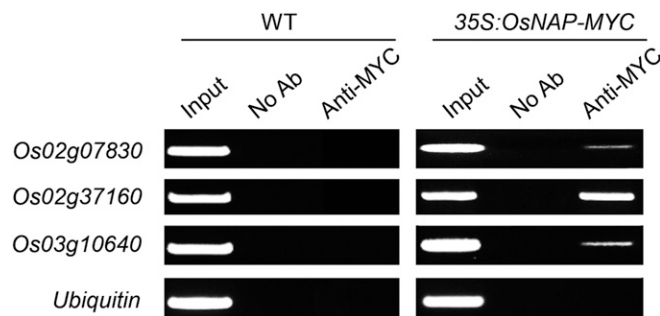

**Fig. 57.** *OsNAP* binds directly to the promoter regions of nutrient transport-related genes. ChIP-PCR analysis of the promoter region of SAGs. The ChIP assays were performed using calli expressing the *OsNAP*-MYC fusion protein. Antibody to the MYC tag was used to immunoprecipitate *OsNAP*-MYC and associated DNA fragments. Immunoprecipitation was performed with or without (No Ab) anti-MYC antibody. Fragments (2,000 bp) of sequences upstream of ATG were chosen as the promoter regions for designing primers. The promoter of *Ubiquitin* was used as a negative control.

**Table S1. Functional classification of DEGs in *ps1-D***

| Category                                                | No. of up-regulated DEGs |        |       |            | No. of down-regulated DEGs |        |       |            |
|---------------------------------------------------------|--------------------------|--------|-------|------------|----------------------------|--------|-------|------------|
|                                                         | ≥2                       | 1 or 2 | Total | Percentage | ≤2                         | 2 or 1 | Total | Percentage |
| <b>Regulatory genes</b>                                 |                          |        |       |            |                            |        |       |            |
| Transcription factors and nucleic acid-binding proteins | 7                        | 18     | 25    | 8.2        | 2                          | 15     | 17    | 5.7        |
| Ubiquitination control                                  | 1                        | 3      | 4     | 1.3        | 0                          | 7      | 7     | 2.4        |
| Protein kinase and phosphatases                         | 0                        | 9      | 9     | 3.0        | 3                          | 14     | 17    | 5.7        |
| Signal transduction                                     | 1                        | 5      | 6     | 2.0        | 2                          | 12     | 14    | 4.7        |
| <b>Macromolecule degradation and mobilization</b>       |                          |        |       |            |                            |        |       |            |
| Amino acid metabolism and N mobilization                | 2                        | 15     | 17    | 5.6        | 2                          | 11     | 13    | 4.4        |
| Lipid metabolism and mobilization                       | 0                        | 9      | 9     | 3.0        | 0                          | 4      | 4     | 1.4        |
| Nucleic acid metabolism and phosphate mobilization      | 1                        | 7      | 8     | 2.6        | 0                          | 6      | 6     | 2.0        |
| Carbohydrate metabolism                                 | 2                        | 6      | 8     | 2.6        | 1                          | 15     | 16    | 5.4        |
| <b>Growth and development</b>                           |                          |        |       |            |                            |        |       |            |
| Embryo and seed development                             | 0                        | 2      | 2     | 0.7        | 0                          | 2      | 2     | 0.7        |
| Flavonoid/anthocyanin pathway                           | 0                        | 5      | 6     | 2.0        | 0                          | 4      | 4     | 1.4        |
| Stress/defense response                                 | 1                        | 22     | 23    | 7.6        | 3                          | 21     | 24    | 8.1        |
| Transport facilitation                                  | 2                        | 12     | 14    | 4.6        | 0                          | 16     | 16    | 5.4        |
| Electron transport                                      | 1                        | 9      | 10    | 3.3        | 1                          | 2      | 3     | 1.0        |
| Biosynthesis                                            | 0                        | 6      | 6     | 2.0        | 1                          | 9      | 10    | 3.4        |
| Hormone                                                 | 1                        | 3      | 4     | 1.3        | 0                          | 3      | 3     | 1.0        |
| Chlorophyll degradation                                 | 0                        | 5      | 5     | 1.6        |                            |        |       |            |
| Metal binding                                           | 0                        | 3      | 3     | 1.0        | 0                          | 1      | 1     | 0.3        |
| Structural                                              | 3                        | 2      | 5     | 1.6        | 0                          | 0      | 0     | 0          |
| Senescence                                              | 0                        | 0      | 0     | 0          | 1                          | 1      | 2     | 0.7        |
| Unknown function                                        | 23                       | 83     | 106   | 34.9       | 5                          | 91     | 96    | 32.4       |
| Others                                                  | 4                        | 29     | 33    | 10.9       | 4                          | 37     | 41    | 13.9       |

DEGs, differentially expressed genes. Functional classification of the DEGs was performed using the biological process category of the Rice Gene Ontology (<http://www.geneontology.com>). Percentage refers to the ratio of genes in each functional category to the total up-regulated or down-regulated DEGs identified in the microarray experiment.

**Table S2. Transport-associated genes identified in the microarray data as being differentially expressed in *ps1-D* mutant plants**

| Locus          | Annotation                                                    | Fold change |
|----------------|---------------------------------------------------------------|-------------|
| Up-regulated   |                                                               |             |
| LOC_Os07g33910 | Transporter family protein                                    | 3.70        |
| LOC_Os04g38680 | Transmembrane amino acid transporter protein                  | 2.52        |
| LOC_Os12g02310 | Lipid transport                                               | 1.98        |
| LOC_Os06g05160 | Sulfate transporter                                           | 1.77        |
| LOC_Os01g65110 | Proton-dependent oligopeptide transporter family protein      | 1.38        |
| LOC_Os11g02389 | Lipid transport                                               | 1.37        |
| LOC_Os04g32920 | Potassium transporter                                         | 1.21        |
| LOC_Os02g57240 | Probable voltage-gated potassium channel subunit beta         | 1.15        |
| LOC_Os01g31940 | Purine permease                                               | 1.14        |
| LOC_Os03g40780 | Transport protein-related                                     | 1.08        |
| LOC_Os12g44100 | Peptide transporter PTR2                                      | 1.06        |
| LOC_Os12g02320 | Transport                                                     | 1.05        |
| LOC_Os07g15460 | Metal transporter Nramp6                                      | 1.05        |
| LOC_Os10g22039 | Mitochondrial import inner membrane translocase subunit Tim17 | 1.03        |
| Down-regulated |                                                               |             |
| LOC_Os06g22960 | Aquaporin protein                                             | -1.82       |
| LOC_Os03g10640 | Calcium-transporting ATPase, plasma membrane-type             | -1.76       |
| LOC_Os02g07830 | OsHKT6, high affinity potassium transporter                   | -1.63       |
| LOC_Os06g38120 | Low-affinity cation transporter                               | -1.54       |
| LOC_Os07g26660 | Aquaporin protein                                             | -1.53       |
| LOC_Os12g12934 | Peptide transporter PTR3-A                                    | -1.46       |
| LOC_Os02g21340 | ABC-2 type transporter family protein                         | -1.41       |
| LOC_Os02g27490 | Bile acid sodium symporter family protein                     | -1.39       |
| LOC_Os04g37990 | Transporter family protein                                    | -1.27       |
| LOC_Os05g07870 | Triose phosphate/phosphate translocator                       | -1.22       |
| LOC_Os06g29790 | Phosphate transporter 1                                       | -1.20       |
| LOC_Os10g28240 | Calcium-transporting ATPase, plasma membrane-type             | -1.18       |
| LOC_Os12g08130 | Amino acid transporter                                        | -1.16       |
| LOC_Os04g12499 | Amino acid transporter protein                                | -1.08       |
| LOC_Os04g55260 | Thiamine-repressible mitochondrial transport protein THI74    | -1.03       |
| LOC_Os02g37160 | Heavy metal transport/detoxification protein                  | -1.02       |

**Table S3. Residual nitrogen, P, S, K, Mg, Fe, and Zn in flag leaves among wild type, *ps1-D*, *OsNAP* OE, and RNAi transgenic lines**

|              | N, %  | P, ppm | S, ppm  | K, ppm  | Mg, ppm | Fe, ppm | Zn, ppm |
|--------------|-------|--------|---------|---------|---------|---------|---------|
| WT           | 1.3   | 607.9  | 927.0   | 4,866.5 | 1,326.1 | 822.9   | 20.3    |
| <i>ps1-D</i> | 1.2   | 438.8  | 683.4   | 4,320.3 | 877.2   | 543.2   | 15.7    |
| Δ, %         | -9.4  | -27.8  | -26.3   | -11.2   | -33.9   | -33.9   | -22.3   |
| OE1          | 1.1   | 531.1  | 688.4   | 4334.9  | 907.6   | 577.7   | 14.7    |
| Δ, %         | -14.9 | -12.6  | -25.7   | -10.9   | -31.6   | -29.8   | -27.4   |
| OE2          | 1.2   | 447.1  | 790.2   | 4,774.8 | 1,187.2 | 603.7   | 16.5    |
| Δ, %         | -7.8  | -26.5  | -14.8   | -1.9    | -10.5   | -26.6   | -18.7   |
| Ri1          | 1.6   | 707.6  | 1,146.2 | 5,971.8 | 1,773.1 | 1,040.5 | 25.7    |
| Δ, %         | 21.1  | 16.4   | 23.6    | 22.7    | 33.7    | 26.4    | 26.9    |
| Ri2          | 1.4   | 806.1  | 1,240.7 | 6,124.9 | 1,623.2 | 1,066.5 | 22.5    |
| Δ, %         | 11.7  | 32.6   | 33.8    | 25.9    | 22.4    | 29.6    | 11.1    |

Ri1 and Ri2 represent two independent *OsNAP* RNAi lines. Differences between the means of wild type and *ps1-D*, OE, or RNAi transgenic plants (Δ %) are reported in terms of change with respect to the wild type. Values are means ± SD of ten biological replicates.



**Table S4. Agronomic traits of *ps1-D* and *OsNAP* RNAi transgenic lines**

|                            | WT         | <i>ps1-D</i> | Ri1         | Ri2         |
|----------------------------|------------|--------------|-------------|-------------|
| Shoot height, cm           | 96.2 ± 1.8 | 75.1 ± 2.2*  | 98.3 ± 0.7* | 98.5 ± 1.6* |
| DWV, g                     | 25.7 ± 1.4 | 18.9 ± 3.2*  | 28.0 ± 2.0* | 29.0 ± 2.6* |
| NPR (0 d after flowering)  | 12.5 ± 0.8 | 10.3 ± 0.8   | 12.6 ± 1.6  | 12.7 ± 1.7  |
| NPR (15 d after flowering) | 6.2 ± 0.2  | 4.5 ± 0.2*   | 6.9 ± 0.3*  | 7.5 ± 0.8*  |

Ri1 and Ri2 represent two independent *OsNAP* RNAi lines. DWV, dry weight of vegetative organs. NPR stands for the rate of net photosynthesis ( $400 \mu\text{mol}\cdot\text{CO}_2\cdot\text{m}^{-2}\cdot\text{s}^{-1}$ ), measured at the heading stage (0 DAF) and 15 d after flowering (15 DAF). Values are means ± SD from at least 10 plants in Beijing. Asterisks indicate a statistically significant difference in comparison to the wild type (\* $P \leq 0.05$ ).

**Table S5. Primers used in this study for molecular cloning of *PS1***

|      |                                                            |
|------|------------------------------------------------------------|
| SF   | CACGACACGCTACTCAACACACCACCTCGCACAGCGTCTCAAGCGGCCGNNNNNGCCT |
| SFP1 | CACGACACGCTACTCAAC                                         |
| SFP2 | ACTCAACACACCACCTCGCACAGC                                   |
| SP1  | AGGCATCGATCGTGAAGTTTCTCATC                                 |
| SP2  | CATTTGGACGTGAATGTAGACACGTCG                                |
| SP3  | GCTTTCGCCTATAAATACGACGGATCG                                |

**Table S6. Primers used in this study for qRT-PCR, to generate DNA constructs, for CHIP-PCR, and for yeast one-hybrid assays**

|                                         | Forward primers                       | Reverse primers                      |
|-----------------------------------------|---------------------------------------|--------------------------------------|
| Primers used for qRT-PCR                |                                       |                                      |
| ACT1                                    | TCCATCTTGGCATCTCTCAG                  | GTACCCTCATCAGGCATCTG                 |
| PS1                                     | CAAGAAGCCGAACGGTTC                    | GTTAGAGTGGAGCAGCAT                   |
| G1                                      | TAACGAGAAGCAACAGGAG                   | ATTGGTTCAGCAGAAGATATG                |
| G2                                      | CAGGTCATGAGTACCAGCA                   | CGGGAGCGAGAAGTACTGAC                 |
| G3                                      | GATCAAGGACATGAGGCACA                  | CCTGGTATCCGGGGTTGTA                  |
| G4                                      | TGCAGGGCAGACCTCTAAGT                  | CGTGCCAACACCATAAACAG                 |
| G5                                      | CATCCCTTTTGGAGTGGAA                   | CACGGGATCTTGGTCACTT                  |
| G6                                      | TGGATGGCAATCACACCTTA                  | GCCCGGACAGTACCAGTAGA                 |
| G7                                      | CGTACCCTTGGTGGAAAGAA                  | TTGTTTCTCCGGGTGTAGG                  |
| G8                                      | ATGTCATAAAGCCGGCTGAC                  | TAGCCCTATGCAATCCTTG                  |
| G9                                      | TAGATGCACACGCTTCTTCG                  | TCCGTCCGGAGAGAATCATC                 |
| G10                                     | GGTGCAATCCAGTGGTTAC                   | AGCCATTGGACAGAACCCAC                 |
| NYC1                                    | CATGCAACACCAACAAAAGG                  | GACCATTCCAGGAGAAGCAG                 |
| NYC3                                    | TGTCGTTGCCATGTGAAGAT                  | TTGGTCAGCCACAATCTA                   |
| SGR                                     | AGGGGTGGTACAACAAGCTG                  | GCTCCTTCCGGAAGATGTAG                 |
| RCCR1                                   | CGCATTTCTCATGGAATTT                   | CTTCTCACGCTGTTTGTCCA                 |
| Osh36                                   | GCACGGAGGCGAACGA                      | TTGAGCGGTAGCACCCATT                  |
| Osi57                                   | ACCCTAAAGTAAATGAAGTC                  | CCTGCTCTTGTCTTTGTA                   |
| Osh69                                   | CCACAACACGGATAACTT                    | GGTGAACACTATGGAACA                   |
| Osi85                                   | GAGCAACGGCGTGGAGA                     | GCGGCGGTAGAGGAGATG                   |
| OsNCED1                                 | ACCATGAAGTCCATGAGGCT                  | TCTCGTAGTCTTGGTCTTGG                 |
| OsNCED2                                 | ATGGAAACGAGGATAGTGGT                  | CTTATTGTTGTGCGAGAAGT                 |
| OsNCED3                                 | CTCCCAAACCATCCAAACCG                  | TGAGCATATCCTGGCGTCGT                 |
| OsNCED4                                 | ATCTCCTTCTCCCTCCTCCCA                 | TCCGACCCTGCTTGATCTTGG                |
| OsNCED5                                 | TCCGAGCTCCTCGTCTGAA                   | AGGTGTTTTGGAATGAACCA                 |
| OsZEP                                   | GGATGCCATTGAGTTTGGTT                  | TGGCTGACTGAAGTCTCTCG                 |
| OsABA8ox1                               | AAGCTGGCAAAAACCAACATC                 | CCGTGCTAATACGGAATCCA                 |
| OsABA8ox2                               | CTACTGCTGATGGTGGCTGA                  | CCCATGGCCTTTGCTTTAT                  |
| OsABA8ox3                               | AGTACAGCCCATTCCTGTG                   | ACGCCTAATCAAACCATTCG                 |
| Os01g01430                              | CAACGATGACGAACACAACC                  | GCAGCATATCTGCAGTGGAA                 |
| Os05g34310                              | GCCCATGGAAACCAAGACTA                  | CGAGCACTGTAACCGTGAGA                 |
| Os07g48450                              | GAGTCCTTGACGACGCTAC                   | ACTCCGCGAGGAAGTTGTC                  |
| Os11g03300                              | TCAGGTAACAGCACCACCAC                  | ATGGGCTGGAATCTGACTG                  |
| Os12g03040                              | CCTCACAGGCACATCAGCTA                  | ATGGGCTGGAATCTGACTG                  |
| Primers used to generate DNA constructs |                                       |                                      |
| PS1-OE                                  | <u>CCCCCGGATGGTTCTGTGCAACCCGGC</u>    | <u>TAGTCTAGATCAGTTCAGTCCCATGTTAG</u> |
| PS1-RNAi                                | <u>GTCACCTCGAGATGAAGTTCGCAACACCTC</u> | <u>GTCAGGATCCTGGAAGGATCTTCTGCATC</u> |
| PS1-GFP                                 | <u>ATCTCGAGGATGGTTCTGTGCAACCCGGC</u>  | <u>ATCCCGGGGTTTATCCCATGTTAGAGTG</u>  |
| PS1-GUS                                 | <u>TCGGTCGACGGCCTCAGTCCCTAAAGGT</u>   | <u>CCGGAATTCGGTTCGACAGAACCATCGTC</u> |

Table S6. Cont.

|                                          | Forward primers                                 | Reverse primers                                   |
|------------------------------------------|-------------------------------------------------|---------------------------------------------------|
| PS1-BD-FULL                              | <u>CGCTCATATGATGGTTCTGTGCAACCCGGCGA</u>         | <u>GGTGGAAATTCAGTTCATCCCCATGTTAGAG</u>            |
| PS1-BD-1/190                             | <u>CGCTCATATGATGGTTCTGTGCAACCCGGCGA</u>         | <u>GGTGGAAATTCACCTGCTCGTGGTCGGAGAGC</u>           |
| PS1-BD-181/392                           | <u>CGCTCATATGGCCGTGCCGCCGCTCTCCGACC</u>         | <u>GGTGGAAATTCAGTTCATCCCCATGTTAGAG</u>            |
| PS1-BD-298/392                           | <u>CGCTCATATGGCGAACAACAGCATGGTTCAG</u>          | <u>GGTGGAAATTCAGTTCATCCCCATGTTAGAG</u>            |
| PS1-BD-157/392                           | <u>CGCTCATATGAACACCTCCATGAGGCTGGATG</u>         | <u>GGTGGAAATTCAGTTCATCCCCATGTTAGAG</u>            |
| PS1-BD-111/392                           | <u>CGCTCATATGGTCGGCGTCAAGAAGGCGCTCG</u>         | <u>GGTGGAAATTCAGTTCATCCCCATGTTAGAG</u>            |
| PS1-BD-62/392                            | <u>CGCTCATATGGACAGGGAGTGGTACTTCTTC</u>          | <u>GGTGGAAATTCAGTTCATCCCCATGTTAGAG</u>            |
| PS1-BD-25/392                            | <u>CGCTCATATGCACTACTCCGCAACCCGGGC</u>           | <u>GGTGGAAATTCAGTTCATCCCCATGTTAGAG</u>            |
| PS1-BD-1/64                              | <u>CGCTCATATGATGGTTCTGTGCAACCCGGCGA</u>         | <u>GGTGGAAATTCACCTCCCTGTCCCCGTAATTCT</u>          |
| PS1-BD-1/100                             | <u>CGCTCATATGATGGTTCTGTGCAACCCGGCGA</u>         | <u>GGTGGAAATTCAGTGGATGGGCTTGTCCGGTG</u>           |
| PS1-BD-1/142                             | <u>CGCTCATATGATGGTTCTGTGCAACCCGGCGA</u>         | <u>GGTGGAAATTCATGCGCGCGCGAGGCGGTAC</u>            |
| Primers used for ChIP-PCR                |                                                 |                                                   |
| SGR                                      | CTCCCATTTTCGTCTTCCAA                            | GGCAGCTGACACACTCACAT                              |
| NYC1                                     | TCGTGTCATTATCCAGCAG                             | GCGTAGGAGGTGTGGTTCAT                              |
| NYC3                                     | CCCGATAAAATGGCTCTGAA                            | TTTGCGGAGAATTCAGGTA                               |
| RCCR1                                    | TCTGGCCTTTTGTGAGCTTT                            | TCGTTTTGCGGTGAAACACTT                             |
| Osh36                                    | CGTCTCACACTAGCCTGGTT                            | TGCAGCTGCTACGGTGACTA                              |
| Osh69                                    | AGCGTCCGACTCAGATCCTA                            | CAACTAAGATCCACGCGTATG                             |
| Osl57                                    | ACAAGTGAAGACCCTGGTG                             | CAGGTAGGGCAGATTTTCAGG                             |
| Osl85                                    | CACGCATGCATGTTCTTCT                             | GCTGCATCAAAGACCACAAG                              |
| Os02g07830                               | AACCCTTGCAACTGTATATG                            | TCGGTGAGATGATTTGGTCA                              |
| Os02g37160                               | AGCGCAAGCAAGATAACCAT                            | ACGGCGGAGTTAAAAAGCAT                              |
| Os03g10640                               | GTGGCCTCGTTGTTTCTTTC                            | GTGGTTAGAGCACCGATTCC                              |
| Ubiquitin                                | TCGGAGACCGTGCTAGGTTT                            | GCCAGCGCCCATCGATT                                 |
| Primers used for yeast one-hybrid assays |                                                 |                                                   |
| PS1-Y1H                                  | <u>GGTGGAAATTCATGGTTCTGTGCAACCCGGCGA</u>        | <u>GGTGCTCGAGTTCAGTTCATCCCCATGTTAGAG</u>          |
| SGRp                                     | <u>TTGAATTCGAGCTCGGTACCGCCGTAACCGAATGTCAAAT</u> | <u>TCGACAGATCCCCGGGTACCGAGAGCGGGTTAAGTGAGAAGA</u> |
| NYC1p                                    | <u>TTGAATTCGAGCTCGGTACCGCAATACGGGAAGGAAAAGA</u> | <u>TCGACAGATCCCCGGGTACCGTCTGCTTTAGCTTT</u>        |
| NYC3p                                    | <u>TTGAATTCGAGCTCGGTACCGGACACCCAGATCTAAGCA</u>  | <u>TCGACAGATCCCCGGGTACCGTCTGCCGACTAGCGTAAG</u>    |
| RCCR1p                                   | <u>TTGAATTCGAGCTCGGTACCAAGGCGAGAGCTGATGTGAT</u> | <u>TCGACAGATCCCCGGGTACCTTTGACACCGTTACGGCTAA</u>   |
| Osh36p                                   | <u>TTGAATTCGAGCTCGGTACCGGACATGGTGTGTAGCTGA</u>  | <u>TCGACAGATCCCCGGGTACCGAGGAGGAAGAAAGGGTAA</u>    |
| Osh69p                                   | <u>TTGAATTCGAGCTCGGTACCGCCGATGTGGCATTATACCT</u> | <u>TCGACAGATCCCCGGGTACCGTGTAGCTACGCAGGATGG</u>    |
| Osl57p                                   | <u>TTGAATTCGAGCTCGGTACCTCAACGTTGTTGTTTGCAG</u>  | <u>TCGACAGATCCCCGGGTACCGAGGTAGGGCAGATTTTCAGG</u>  |

The underlined nucleotides indicate the restriction sites for cloning.
